# Supplementary material for: Suboptimal diabetic control and psychological burden after the triple disaster in Japan: the Fukushima Health Management Survey
Source: HighWire-hosted journal article supplement (doi:10.1136/bmjdrc-2020-002007), 2021-09-01
Supplement: bmjdrc-2020-002007supp005_data_supplement.pdf [file bmjdrc-2020-002007supp005_data_supplement.pdf]

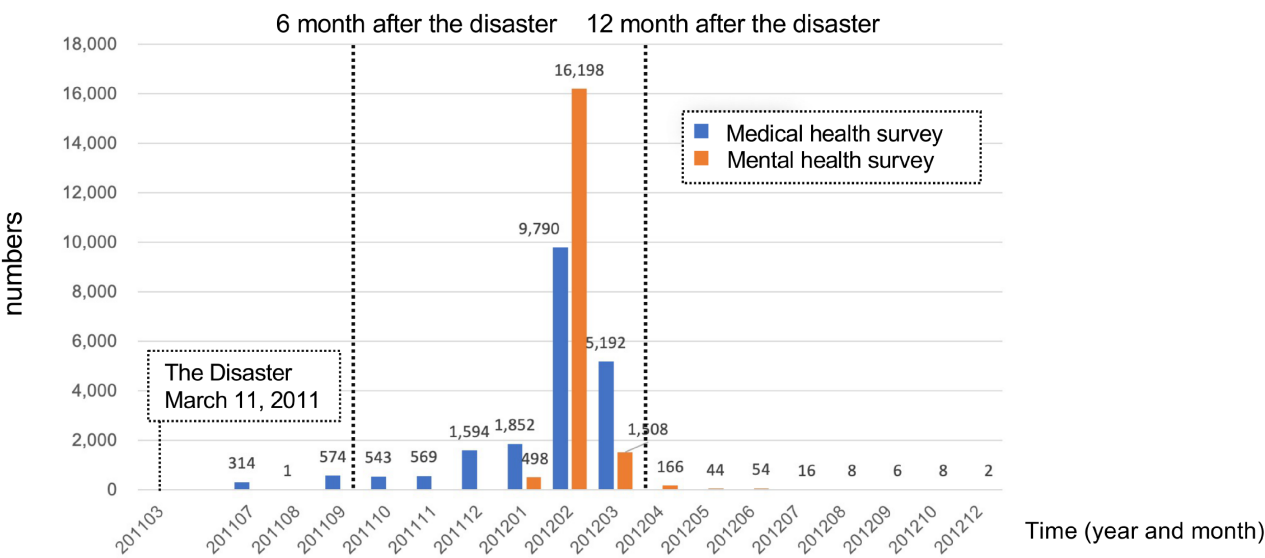

Numbers of paritipants when categorized for time after the diaster and intervals between medical and mental health surveys

|                                              |                                                   |                 |               |
|----------------------------------------------|---------------------------------------------------|-----------------|---------------|
| A. Within 6 month of the Disaster            |                                                   |                 |               |
|                                              | Interval between medical and mental health survey |                 |               |
|                                              | Within 1 month                                    | Within 2 months | Over 2 months |
| Medical health survey → Mental health survey | 0                                                 | 0               | 0             |
| Mental health survey → Medical health survey | 0                                                 | 0               | 0             |
| Total                                        | 0                                                 | 0               | 0             |

|                                              |                                                   |                 |               |
|----------------------------------------------|---------------------------------------------------|-----------------|---------------|
| B. Six months after the Disaster             |                                                   |                 |               |
|                                              | Interval between medical and mental health survey |                 |               |
|                                              | Within 1 month                                    | Within 2 months | Over 2 months |
| Medical health survey → Mental health survey | 6,157                                             | 7,334           | 2,516         |
| Mental health survey → Medical health survey | 7,373                                             | 8,763           | 22            |
| Total                                        | 13,530                                            | 16,097          | 2,538         |

**Supplemental Figure S2.** The time performed after the disaster (upper panel) and numbers of paritipants when categorized for time after the diaster and intervals between medical and mental health surveys (lower panel)
